# Supplementary material for: Mobile Technologies and Geographic Information Systems to Improve Health Care Systems: A Literature Review
Source: PubMed Central journal article supplement (PMC4114429; doi:10.2196/mhealth.3216), 2014-05-08
Supplement: mhealth_v2i2e21_app1.pdf [file mhealth_v2i2e21_app1.pdf]

## Multimedia Appendix 1. Treatment and disease management – Overview of papers mHealth articles

| Research Country and reference | Sample size | Device | Aims                                                                                                                                                             | Key effects                                                                                                                                |
|--------------------------------|-------------|--------|------------------------------------------------------------------------------------------------------------------------------------------------------------------|--------------------------------------------------------------------------------------------------------------------------------------------|
| USA [1]                        | 8           | Voice  | To evaluate the practicality and acceptability of using cell phone reminders to improve HAART adherence in HIV-infected adolescents                              | Cell phone reminders were practical and acceptable to pilot study participants. A 12-week intervention was not adequate for most subjects. |
| Ireland [2]                    |             | SMS    | To audit non-attendance rates at ENT outpatient clinics following the introduction of a text reminder system.                                                    | Sending text message reminders is a simple and cost-effective way to improve non-attendance at ENT outpatient clinics                      |
| Kenya [3]                      |             | SMS    | To compare the effectiveness of cell phone-supported SMS to standard care on adherence, quality of life, retention, and mortality in a population receiving ART. | No findings                                                                                                                                |
| UK [5]                         |             | SMS    | To evaluate the use of SMS to reduce nonattendance at outpatient clinics                                                                                         | The impact is modest, but so also is the cost, about 7.50 pounds per "no-show" avoided.                                                    |
| Denmark [6]                    | 26          | SMS    | To examine the impact of receiving a daily text message reminder on one's cell phone on adherence to asthma treatment.                                           | Daily SMS reminders improved anti-asthmatic medication; the perception of receiving a daily SMS was positive.                              |

|             |     |                     |                                                                                                                                                                                             |                                                                                                                                                                                                                                                                                                                                                           |
|-------------|-----|---------------------|---------------------------------------------------------------------------------------------------------------------------------------------------------------------------------------------|-----------------------------------------------------------------------------------------------------------------------------------------------------------------------------------------------------------------------------------------------------------------------------------------------------------------------------------------------------------|
| Peru [7]    |     | SMS                 | To characterize effective ART reminders strategies for people living with HIV/AIDS to improve adherence using SMS based on patient perspectives.                                            | The participants preferred text messages over recorded voice messages or phone calls as reminder alerts because they are easier, more confidential, and more readily-available; overall participants were in favour of receiving medication reminders on their cell phones, and preferred characteristic for the reminders was that they be motivational. |
| Peru [8]    |     | SMS, voice and PDAs | To report on perceptions towards use of ICT as a means to support antiretroviral medication adherence and HIV transmission risk reduction.                                                  | Patients had positive perceptions about using the Internet, cell phones and PDAs for HIV health promotion interventions.                                                                                                                                                                                                                                  |
| Spain [9]   | 254 | SMS                 | To assess the impact of a SMS-based strategy on adherence to antipsychotic treatment.                                                                                                       | Daily treatment SMS reminders are efficacious in the enhancement of adherence to oral antipsychotic treatment.                                                                                                                                                                                                                                            |
| France [10] | 424 | SMS                 | To assess the feasibility and acceptability of sending a daily SMS reminder to remind soldiers to take their malaria chemoprophylaxi, and to assess the impact of the daily reminder SMS on | SMS did not increase malaria chemoprophylaxis compliance above baseline. The intervention was feasible and SMS reminders were very useful.                                                                                                                                                                                                                |

|                  |     |              |                                                                                                                                                                                                          |                                                                                                                                                                                                                                     |
|------------------|-----|--------------|----------------------------------------------------------------------------------------------------------------------------------------------------------------------------------------------------------|-------------------------------------------------------------------------------------------------------------------------------------------------------------------------------------------------------------------------------------|
|                  |     |              | chemoprophylaxis compliance                                                                                                                                                                              |                                                                                                                                                                                                                                     |
| Ireland [11]     | 59  | SMS          | To assess the levels of self-reported adherence to antidepressant medication in the community and to investigate the acceptability of text message reminders to self-reported unintentional non-adherers | SMS reminders were acceptable to approximately 60% of patients who reported being unintentionally non-adherent.                                                                                                                     |
| Netherlands [12] | 104 | SMS          | To investigate the effect of these SMS reminders on adherence to oral antidiabetics in patients using RTMM and investigate patients' experiences with RTMM                                               | RTMM with SMS reminders improves adherence of type 2 diabetes patients, especially the precision with which patients follow their prescribed regimen, and is well accepted by patients.                                             |
| Netherlands [13] |     | SMS          | To describe the design of an intervention study aimed at evaluating the effect of RTMM on adherence to oral antidiabetics.                                                                               | No findings                                                                                                                                                                                                                         |
| Korea [14]       | 69  | Mobile phone | To compare the effect of a mobile phone with a glucometer integrated into the battery pack on management of type 2 diabetes to the Internet-based glucose monitoring system.                             | Two-way communication between doctors and patients using the diabetes phone was as effective for glucose control as the previously-studied Internet-based monitoring system and it was good for patient satisfaction and adherence. |
| USA [16]         |     | SMS          | To (1) develop a diabetes-                                                                                                                                                                               | Participants expressed high                                                                                                                                                                                                         |

|              |    |              |                                                                                                                                                                                                                                                                     |                                                                                                                                                                                      |
|--------------|----|--------------|---------------------------------------------------------------------------------------------------------------------------------------------------------------------------------------------------------------------------------------------------------------------|--------------------------------------------------------------------------------------------------------------------------------------------------------------------------------------|
|              |    |              | focused text message-based reminder and data collection system in an urban African-American population; (2) assess the feasibility of its implementation; and (3) assess logistical challenges and perceived benefits of such a system on diabetes self-management. | satisfaction with text messages; text messaging may be a feasible and useful approach to improve diabetes self-management in urban African Americans.                                |
| USA [17]     | 30 | SMS          | To examine the feasibility of utilizing of cell phone technology to assist with diabetes self-care in a clinic population as well as its impact on clinical outcomes.                                                                                               | The intervention had a positive impact on some clinical outcome and self-efficacy; it was feasible.                                                                                  |
| Korea [18]   | 33 | SMS          | To investigate the effect of a nurse short message service by cellular phone and the Internet on glycosylated hemoglobin (HbA1c) levels and adherence to diabetes control recommendations.                                                                          | After 12 weeks, the patients had a mean decrease of 1.1% in HbA1c level and an increase in diabetic medication taking, 30 minutes of physical exercise, and foot care adherence.     |
| Austria [19] | 10 | Mobile phone | To evaluate the feasibility and user acceptance of a mobile phone-based data service to assist DM1 patients on intensive insulin treatment.                                                                                                                         | Participants' attitudes were positive; mobile phone provided an ubiquitous, easy-to-use, and cost efficient solution for patient-centered data acquisition in the management of DM1. |
| Canada [20]  |    | Mobile       | To develop and pilot-test a                                                                                                                                                                                                                                         | Patients' acceptance rate                                                                                                                                                            |

|              |     |              |                                                                                                                                                                                                                                    |                                                                                                                                           |
|--------------|-----|--------------|------------------------------------------------------------------------------------------------------------------------------------------------------------------------------------------------------------------------------------|-------------------------------------------------------------------------------------------------------------------------------------------|
|              |     | phone        | home blood-pressure (BP) tele-management system that actively engages patients in the process of care.                                                                                                                             | was high. Home BP showed a significant improvement during the intervention.                                                               |
| Austria [21] | 25  | Mobile phone | To assess the technical feasibility, usability and acceptance of a web-based therapy management system with mobile phone access to support obese patients.                                                                         | Participants' attitudes were positive. Mobile phones can be utilized as patient terminals for therapy in patients suffering from obesity. |
| USA [22]     | 36  | Mobile phone | To compare active interventions and usual care for glucose control in a randomized clinical trial (RCT) among persons with diabetes cared for by primary care physicians (PCPs) over the course of 1 year.                         | No findings                                                                                                                               |
| USA [23]     | 163 | Mobile phone | To test whether adding mobile application coaching and patient/provider web portals to community primary care compared with standard diabetes management would reduce glycated hemoglobin levels in patients with type 2 diabetes. | Mobile phone-based treatment/behavioral coaching intervention improved glycated hemoglobin.                                               |
| USA [24]     | 4   | SMS          | To test the feasibility and utilization of tracking asthma symptoms through                                                                                                                                                        | This method of management is feasible; participants' satisfaction was good.                                                               |

|          |    |              |                                                                                                                                                                                                                                                                                        |                                                                                                                                                                 |
|----------|----|--------------|----------------------------------------------------------------------------------------------------------------------------------------------------------------------------------------------------------------------------------------------------------------------------------------|-----------------------------------------------------------------------------------------------------------------------------------------------------------------|
|          |    |              | an innovative mobile phone application.                                                                                                                                                                                                                                                |                                                                                                                                                                 |
| UK [25]  | 48 | Mobile phone | To explore the opinions and concerns of people with asthma and primary care clinicians on the potential role of mobile phone monitoring technology in supporting asthma self-management.                                                                                               | Participant's considered the intervention as facilitating guided self-management, and provided much-needed confidence.                                          |
| UK [26]  | 46 | PDA          | To conduct an observational study using electronic peak flow monitoring and mobile phone technology in a UK general practice population.                                                                                                                                               | The intervention increased awareness and information about asthma, improved ability to monitor/manage the condition with the feedback.                          |
| USA [27] | 30 | Mobile phone | To (1) assess the impact on A1c of a cell phone-based diabetes management software system used with web-based data analytics and therapy optimization tools; (2) examine health care provider (HCP) adherence to prescribing guidelines and assessed HCPs' adoption of the technology. | Participants achieved statistically significant improvements in A1c. HCP and patient satisfaction with the system was clinically and statistically significant. |
| USA [28] | 40 | SMS          | To determine if daily automated SMS would result in increased adherence to                                                                                                                                                                                                             | Electronic reminders in the form of daily, customized SMS were not associated with significant differences                                                      |

|             |     |              |                                                                                                                                                            |                                                                                                                                                        |
|-------------|-----|--------------|------------------------------------------------------------------------------------------------------------------------------------------------------------|--------------------------------------------------------------------------------------------------------------------------------------------------------|
|             |     |              | recommended use of topical acne medication and consequently greater improvement in acne.                                                                   | in adherence to topical medications in patients with mild to moderate acne and had no significant effect on therapeutic response.                      |
| USA [29]    | 48  | SMS          | To evaluate the feasibility, acceptability, and preliminary efficacy of text message reminders to improve adherence to ART for youth living with HIV/AIDS. | Personalized, interactive, daily SMS reminders were feasible and acceptable, and they significantly improved self-reported adherence.                  |
| USA [30]    | 16  | SMS          | To assess the feasibility of Ecological Momentary Assessment via text messaging to measure asthma medication use and symptoms in African Americans.        | The assessment found low medication adherence rates and reasons for missing medication consistent with previous research with youth with asthma.       |
| USA [31]    | 580 | SMS          | To evaluate medication adherence among patients opting to receive text message medication reminders and a well-matched control cohort.                     | The SMS intervention improved medication adherence, and assisted in preserving higher rates of adherence over time.                                    |
| Korea [32]  |     | mobile phone | To investigate the efficacy of a u-healthcare service using Zigbee and mobile phone for elderly patients with diabetes mellitus or heart diseases.         | Patients' satisfaction was relatively high; The mean transmission frequencies were 2.1 times/day in blood glucose monitoring and 6.1 times/day in ECG. |
| Canada [33] | 102 | SMS          | To determine the effectiveness of cell phone wireless text messaging for improving adherence                                                               | Wireless text messaging reminders improved adherence to healthy behaviour (taking vitamin C                                                            |

|                  |     |     |                                                                                                                                                                                                                                          |                                                                                                                                                                                                                                       |
|------------------|-----|-----|------------------------------------------------------------------------------------------------------------------------------------------------------------------------------------------------------------------------------------------|---------------------------------------------------------------------------------------------------------------------------------------------------------------------------------------------------------------------------------------|
|                  |     |     | to a healthy behaviour.                                                                                                                                                                                                                  | for preventive reasons) over a 1-month intervention                                                                                                                                                                                   |
| Kenya [34]       | 431 | SMS | To test the efficacy of SMS reminders on adherence to ART among patients attending a rural clinic                                                                                                                                        | Participants receiving SMS reminders achieved high adherence rate and were significantly less likely to experience treatment interruptions exceeding 48 h during the 48-week follow-up period than participants in the control group. |
| Cameroon [35]    | 200 | SMS | To investigate the use of motivational SMS to improve adherence to ART over six months.                                                                                                                                                  | Standardized motivational SMS did not significantly improve adherence to ART.                                                                                                                                                         |
| Brazil [36]      | 21  | SMS | To assess whether a warning system based on mobile SMS increases the adherence of HIV-infected Brazilian women to antiretroviral drug-based treatment regimens and their impressions and satisfaction with respect to incoming messages. | SMS messaging can help Brazilian women living with HIV/AIDS to adhere to antiretroviral therapy for a period of at least 4 months.                                                                                                    |
| New Zealand [37] | 260 | SMS | To investigate whether a text message programme targeted at changing patients' illness and medication beliefs would improve adherence in young adult asthma patients.                                                                    | The intervention increased adherence to asthma preventer inhaler and may be useful for other illnesses where adherence is a major issue.                                                                                              |
| UK [38]          |     | SMS | To audit non-attendance rates at ENT out-patient                                                                                                                                                                                         | The mean rate of non-attendance reduced from                                                                                                                                                                                          |



|  |  |  |                                                               |                                                                                                                                       |
|--|--|--|---------------------------------------------------------------|---------------------------------------------------------------------------------------------------------------------------------------|
|  |  |  | clinics following the introduction of a text reminder system. | 33.6 to 22 per cent. A text message reminder is a simple and cost-effective way to improve non-attendance at ENT out-patient clinics. |
|--|--|--|---------------------------------------------------------------|---------------------------------------------------------------------------------------------------------------------------------------|
