# Supplementary material for: Mobile Technologies and Geographic Information Systems to Improve Health Care Systems: A Literature Review
Source: PubMed Central journal article supplement (PMC4114429; doi:10.2196/mhealth.3216), 2014-05-08
Supplement: mhealth_v2i2e21_app6.pdf [file mhealth_v2i2e21_app6.pdf]

## Multimedia Appendix 6. Health promotion and disease prevention – overview of mHealth articles

| Research Country and reference | Sample size | Device       | Aims                                                                                                                                                                                                       | Findings                                                                                                                                                                   |
|--------------------------------|-------------|--------------|------------------------------------------------------------------------------------------------------------------------------------------------------------------------------------------------------------|----------------------------------------------------------------------------------------------------------------------------------------------------------------------------|
| Ireland [2]                    |             | SMS          | To audit non-attendance rates at ENT out-patient clinics following the introduction of a text reminder system.                                                                                             | Sending text message reminders is a simple and cost-effective way to improve non-attendance at ENT outpatient clinics                                                      |
| USA [132]                      | 70          | SMS          | To evaluate the effectiveness of cellular telephone text messaging as a reminder tool for improving adherence to sunscreen application.                                                                    | SMS technology offers an innovative, low- cost, and effective method of improving adherence to sunscreen application.                                                      |
| USA [133]                      | 195         | SMS          | To determine the impact of text message immunization reminder-recalls in an urban, low-income population.                                                                                                  | The intervention improved immunization coverage in a low-income, urban population.                                                                                         |
| USA [134]                      | 10          | Mobile phone | To evaluate user satisfaction with the integrated system, including the potential of the device to transmit self-monitoring data to a website for review and analysis by clinicians, parents, and patients | Adolescents liked the integration of the two technologies and agreed that the glucometer was easy to use and that the tool was useful in the management of their diabetes. |
| USA [135]                      | 50          | SMS          | To test the feasibility of using automated SMS technology to monitor appetite ratings hourly over seven consecutive days.                                                                                  | Automated text-messaging is a feasible method to monitor appetite ratings.                                                                                                 |
| USA [136]                      | 20          | SMS          | To examine the use of tailored messages sent to                                                                                                                                                            | Computerized tailored SMS is a feasible adjunct to                                                                                                                         |

|           |      |                     |                                                                                                                                                            |                                                                                                                                                                                                    |
|-----------|------|---------------------|------------------------------------------------------------------------------------------------------------------------------------------------------------|----------------------------------------------------------------------------------------------------------------------------------------------------------------------------------------------------|
|           |      |                     | obese adolescents enrolled in a weight management programme, as a means of increasing adherence.                                                           | multidisciplinary obesity treatment. Adolescents perceived the intervention as an enjoyable means of improving their adherence to healthy lifestyle practices.                                     |
| USA [137] | 95   | Mobile phone: voice | To assess the efficacy of an innovative smoking cessation (SC) intervention targeted to a multiethnic, economically disadvantaged HIV-positive population. | Patients were receptive to, and could be helped by SC treatment. Counseling delivered by cellular telephone, can significantly increase smoking abstinence rates over that achieved by usual care. |
| USA [138] | 95   | Mobile phone        | To assess the effects of a cell phone intervention (CPI) on hypothesized mediators demonstrated to influence cessation outcomes.                           | CPI group experienced greater reductions in anxiety and depression, and increases in self-efficacy.                                                                                                |
| USA [139] | 95   | SMS                 | To investigate the feasibility of SMS to enable ongoing communication with African-American women participating in a weight management program.            | Early feasibility and acceptability of SMS as a method for promoting healthy behaviors for weight maintenance.                                                                                     |
| USA [140] | 9213 | SMS                 | To evaluate targeted SMS reminders for low-income, urban parents to promote receipt of influenza vaccination among children and adolescents.               | The SMS intervention compared with usual care was associated with an increased rate of influenza vaccination. However, the overall influenza vaccination rate remained low.                        |
| USA [141] | 1200 | SMS                 | To evaluate the effect of SMS on attendance following                                                                                                      | Text messaging resulted in a modest improvement                                                                                                                                                    |

|          |     |                   |                                                                                                                                                                             |                                                                                                                                                                                                 |
|----------|-----|-------------------|-----------------------------------------------------------------------------------------------------------------------------------------------------------------------------|-------------------------------------------------------------------------------------------------------------------------------------------------------------------------------------------------|
|          |     |                   | male circumcision for HIV prevention.                                                                                                                                       | in attendance at the 7-day post-operative clinic visit following adult male circumcision.                                                                                                       |
| UK [142] |     | SMS               | To assess the effectiveness of a text message result service within an inner London sexual health clinic.                                                                   | The intervention resulted in saving of staff time per month; reduced number of days to diagnosis.                                                                                               |
| UK [143] | 288 | Mobile phone      | To determine whether mobile phone based monitoring improves asthma control compared with standard paper based monitoring strategies.                                        | Mobile technology does not improve asthma control or increase self-efficacy compared with paper based monitoring. The mobile technology was not cost-effective.                                 |
| UK [144] |     | Mobile phone      | To describe the development and implementation of an innovative real-time telemedicine system based around transmission and feedback of data to and from a mobile phone.    | Patients had immediate feedback. Clinicians supporting patients had access to summary screens identifying users not testing, and those with levels of blood glucose outside pre-defined limits. |
| UK [145] | 11  | Mobile phone: GPS | To describe the use of global positioning system (GPS) technology to locate missing persons with dementia.                                                                  | When compliance was high, the tracking system was highly reliable and accurate.                                                                                                                 |
| UK [146] | 21  | SMS               | To explore the feasibility, acceptability, and efficacy of a SMS-based intervention in the aftercare of bulimia nervosa patients who had received outpatient psychotherapy. | Levels of use of the program were relatively low and attrition high, indicating limited acceptance of the intervention.                                                                         |
| UK [147] | 201 | SMS               | To determine the                                                                                                                                                            | Routine SMS texting is a                                                                                                                                                                        |

|          |     |              |                                                                                                                                                                                               |                                                                                                                                                                                                                                                                      |
|----------|-----|--------------|-----------------------------------------------------------------------------------------------------------------------------------------------------------------------------------------------|----------------------------------------------------------------------------------------------------------------------------------------------------------------------------------------------------------------------------------------------------------------------|
|          |     |              | effectiveness of a SMS reminder in improving attendance in return general ophthalmology clinic patients                                                                                       | cost-effective means of reducing DNAs and should become standard practice.                                                                                                                                                                                           |
| UK [148] | 173 | SMS          | To evaluate the effectiveness of texting appointment reminders to patients who persistently fail to attend appointments.                                                                      | No significant reduction in non-attendance rates, as a result of texting appointment reminders to patients who persistently fail to attend their general practice appointments.                                                                                      |
| UK [149] | 276 | SMS          | To evaluate the operational and financial efficacy of sending SMS to patients with outpatient clinic appointments.                                                                            | The use of SMS as a reminder may reduce the failure to attend rate for outpatient paediatric dental appointments.                                                                                                                                                    |
| UK [150] | 447 | SMS          | To assess the effectiveness of the use of SMS-based reminders for hospital outpatient appointments as a method of reducing the non-attendance rates in an inner-city London teaching hospital | The intervention was associated with a reduction of 38% in the likelihood of patients not attending their appointments, compared to no appointment reminder. The SMS may also be more cost-effective than traditional appointment reminders and require less labour. |
| UK [151] |     | SMS          | To (1) assess whether SMS reminders would reduce non-attendance at a paediatric outpatient clinic; (2) clarify the families' attitude towards receiving an SMS reminder.                      | SMS reminders reduced non-attendance at the paediatric outpatient clinic.                                                                                                                                                                                            |
| UK [152] | 276 | Mobile phone | To assess the patterns and dynamics of mobile phone                                                                                                                                           | Mobile phones have a potential for use in                                                                                                                                                                                                                            |

|               |      |     |                                                                                                                                                                                                      |                                                                                                                                                                                                                    |
|---------------|------|-----|------------------------------------------------------------------------------------------------------------------------------------------------------------------------------------------------------|--------------------------------------------------------------------------------------------------------------------------------------------------------------------------------------------------------------------|
|               |      |     | usage amongst an ART cohort in rural Uganda and ascertain its feasibility for improving clinic attendance.                                                                                           | resource-constrained settings to substantially improve the clinical management of HIV/AIDS.                                                                                                                        |
| UK [153]      |      |     | To assess whether the use of SMS reminders sent to patients prior to their dental appointments improved attendance rates for two dentists at a dental access centre.                                 | SMS appointment reminders reduced the number of failed appointments significantly. They can provide an automated, non-intrusive, and cost-effective method of improving patient attendance at dental appointments. |
| UK [154]      | 2817 | SMS | To examine the effect of SMS reminders on the attendance of appointments at four community mental health clinics.                                                                                    | SMS-based technology can offer a time-, labor-, and cost-efficient strategy for encouraging engagement with psychiatric outpatient services                                                                        |
| Norway [155]  | 15   | SMS | To sought an understanding of the tested system's potential role, feasibility of use in daily life, desired functionality, and approaches that may be relevant for future developments and research. | The system was easily integrated into everyday life and was particularly effective when children measured their blood glucose levels regularly.                                                                    |
| Ireland [156] | 6    | SMS | To evaluate the accuracy and viability of a mobility telemonitoring system, based on the SMS, to monitor the functional mobility of elderly subjects in an unsupervised environment.                 | Strong positive correlation's were found for the detection of sitting ( $r = 0.996$ ) and for the combined postures of standing and walking ( $r = 0.994$ ). Subjects suggested that a                             |

|                   |      |              |                                                                                                                                                                                                                                   |                                                                                                                                                                                                                                         |
|-------------------|------|--------------|-----------------------------------------------------------------------------------------------------------------------------------------------------------------------------------------------------------------------------------|-----------------------------------------------------------------------------------------------------------------------------------------------------------------------------------------------------------------------------------------|
|                   |      |              |                                                                                                                                                                                                                                   | lighter, smaller and wireless unit would be more effective.                                                                                                                                                                             |
| Ireland [157]     |      | SMS          | To describe a SMS-based mobility monitoring system that can monitor a subject independently of his or her location.                                                                                                               | It provides long-term data on which clinicians can base their clinical decisions. The system also has the potential to reduce the financial burden on health care services by facilitating more efficient use of health care resources. |
| Netherlands [158] | 141  | SMS          | To analyze whether self-monitoring of lifestyle behaviours through a SMS maintenance treatment (SMSMT) with personalized feedback positively effects weight, lifestyle behaviours and psychological well-being in obese children. | There was no positive effect of SMSMT on weight, eating behaviour or psychological well-being in obese children. SMSMT seems to be a feasible method of treatment delivery.                                                             |
| Netherlands [159] | 141  | SMS          | To explore the effect of an SMS approach aimed at improving treatment results and reducing dropout rates in a pediatric lifestyle intervention.                                                                                   | SMS maintenance treatment is effective in reducing dropout rates from a pediatric lifestyle intervention.                                                                                                                               |
| Austria [160]     |      | Mobile phone | To provide an easy way for documenting the course of psoriasis during acute episodes as well as during remission phases by the use of an electronic therapy diary.                                                                | Mobile phone-based acquisition of images of dermatological lesions by patients themselves is feasible with sufficient quality for therapy assessment.                                                                                   |
| New Zealand       | 1705 | SMS          | To determine whether a                                                                                                                                                                                                            | A mobile phone-based                                                                                                                                                                                                                    |

|                   |       |     |                                                                                                                                                                                                      |                                                                                                                                                                                                                                         |
|-------------------|-------|-----|------------------------------------------------------------------------------------------------------------------------------------------------------------------------------------------------------|-----------------------------------------------------------------------------------------------------------------------------------------------------------------------------------------------------------------------------------------|
| [161]             |       |     | smoking cessation service using mobile phone text messaging is as effective for Maori as non-Maori.                                                                                                  | cessation programme was as effective for Maori as non-Maori at increasing short-term self-reported quit rates.                                                                                                                          |
| New Zealand [162] | 1705  | SMS | To determine the effectiveness of a mobile phone SMS smoking cessation programme.                                                                                                                    | A SMS based smoking cessation programme doubled quit rates at six weeks.                                                                                                                                                                |
| Australia [163]   | 1771  | SMS | To determine the impact of using SMS on a population level on sexual health knowledge and behavior.                                                                                                  | SMS appear to be a feasible, popular, and effective method of sexual health promotion to young people with a relatively low withdrawal rate, positive feedback, and an observed improvement in sexual health knowledge and STI testing. |
| Australia [164]   | 2151  | SMS | To evaluate the effect of appointment reminders sent as SMS text messages to patients' mobile telephones on attendance at outpatient clinics.                                                        | SMS may be a suitable means of improving patient attendance.                                                                                                                                                                            |
| Australia [165]   | 22658 | SMS | To evaluate the operational and financial efficacy of sending short message service (SMS) text message reminders to the mobile telephones of patients with scheduled outpatient clinic appointments. | The FTA reduction coupled with the increase in patient revenue suggests that reminding patients using SMS is a very cost effective approach for improving patient attendance.                                                           |
| Kenya [166]       | 119   | SMS | To assess whether SMS reminders sent to health                                                                                                                                                       | In resource-limited settings, malaria control                                                                                                                                                                                           |

|                 |      |            |                                                                                                                                                             |                                                                                                                                                                           |
|-----------------|------|------------|-------------------------------------------------------------------------------------------------------------------------------------------------------------|---------------------------------------------------------------------------------------------------------------------------------------------------------------------------|
|                 |      |            | workers' mobile phones could improve and maintain their adherence to treatment guidelines for outpatient paediatric malaria.                                | programmes should consider use of text messaging to improve health workers' case-management practices.                                                                    |
| Croatia [167]   | 16   | SMS        | To examine Global System for Mobile Communications mobile telephone SMS as a novel means of telemedicine in Home peak expiratory flow monitoring.           | SMS is a convenient, reliable, affordable, and secure means of telemedicine that may improve asthma control when added to a written action plan and standard follow-up.   |
| Singapore [168] | 120  | SMS        | To evaluate the feasibility of using the mobile phone SMS for symptom monitoring in patients with asthma.                                                   | There was no reduction in admission rates in either group. The service was accepted by most patients.                                                                     |
| Brazil [169]    |      | SMS        | To present the results of a study on the impact of appointment reminders sent as SMS to patients' cell phones on nonattendance rates at outpatient clinics. | Sending appointment reminders as SMS to patients' cell phones is an effective strategy to reduce nonattendance rates.                                                     |
| China [171]     |      | SMS        | To design a product and service for Chinese BP measurement needs with special focus on Community Healthcare Centers/Points.                                 | No findings                                                                                                                                                               |
| China [172]     | 1859 | SMS, voice | To compare the efficacy of a SMS text messaging and phone reminder to improve attendance rates at a health promotion center.                                | SMS and call are effective reminders for improving attendance rate at a health promotion center. SMS reminder may be more cost-effective compared with the call reminder. |



|                 |     |     |                                                                                                                                                                        |                                                                                                                                                                        |
|-----------------|-----|-----|------------------------------------------------------------------------------------------------------------------------------------------------------------------------|------------------------------------------------------------------------------------------------------------------------------------------------------------------------|
| Korea [173]     | 51  | SMS | To investigate the effectiveness of an educational intervention that used both the cellular phone and the Internet to provide a SMS relating to plasma glucose levels. | This educational intervention using the Internet and an SMS by cellular phone improved levels of HbA(1)c and 2HPMG.                                                    |
| Korea [174]     | 51  | SMS | To investigate the effectiveness of a nurse SMS by cellular phone and wire Internet on plasma glucose levels in people with diabetes for six months.                   | This web-based intervention using SMS of cellular phone improved HbA1c and 2HPMG for six months in type-2 diabetic patients.                                           |
| India [176]     | 106 | SMS | To find out the effectiveness of SMS as a reminder system for regular practice of BSE by women.                                                                        | SMS increased the practice of breast self-examination.                                                                                                                 |
| Malaysia [178]  | 993 | SMS | To determine the effectiveness of a text messaging reminder in improving attendance in primary care.                                                                   | Text messaging reminder system was effective in improving attendance rate in primary care. It was more cost-effective compared with the mobile phone reminder.         |
| Malaysia [179]  | 931 | SMS | To determine if SMS would be effective in reducing non-attendance in patients on long-term follow-up, compared with telephone reminders and no reminder.               | Text messaging was found to be as effective as telephone reminder in reducing non-attendance in patients who required long-term follow-up for their chronic illnesses. |
| Australia [278] | 43  | SMS | To present the results of evaluation focus groups among participants who received twelve sexual health                                                                 | Text messages were viewed as an acceptable and 'personal' means of health promotion, with participants                                                                 |

|  |  |  |                                                                                                                                              |                                                                                                                                                                       |
|--|--|--|----------------------------------------------------------------------------------------------------------------------------------------------|-----------------------------------------------------------------------------------------------------------------------------------------------------------------------|
|  |  |  | related SMS as part of a study examining the impact of text messaging for sexual health promotion to on young people in Victoria, Australia. | particularly valuing the informal language. There was a preference for messages that were positive, relevant and short and for messages to cover a variety of topics. |
|--|--|--|----------------------------------------------------------------------------------------------------------------------------------------------|-----------------------------------------------------------------------------------------------------------------------------------------------------------------------|
